# Supplementary material for: Elasmobranch genome sequencing reveals evolutionary trends of vertebrate karyotype organization
Source: PubMed Central journal article supplement — Genome Res. 2023 Sep;33(9):1527–40. doi: 10.1101/gr.276840.122 (PMC10620051; doi:10.1101/gr.276840.122), 2023-09
Supplement: Supplemental_Information.pdf [file Supplemental_Information.pdf]

A

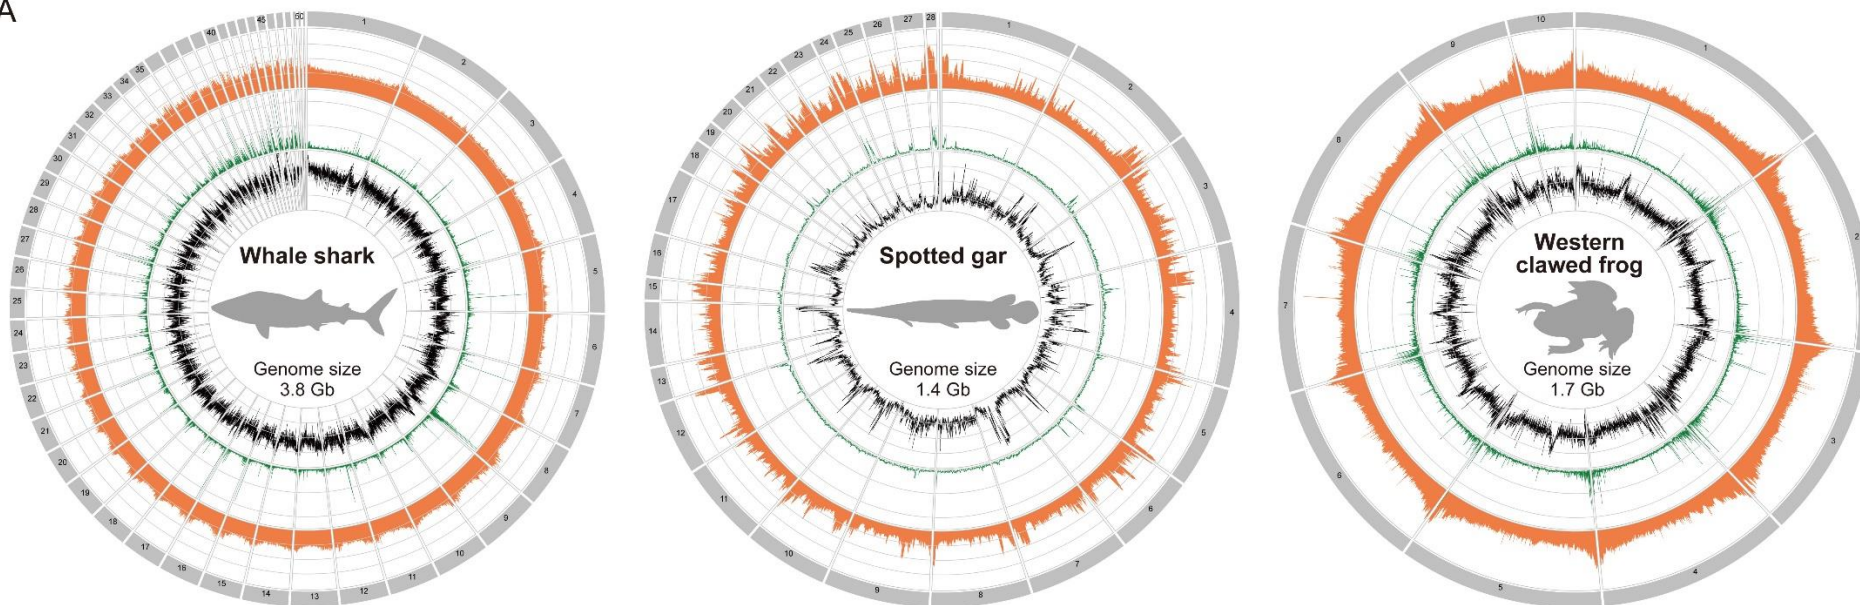

B

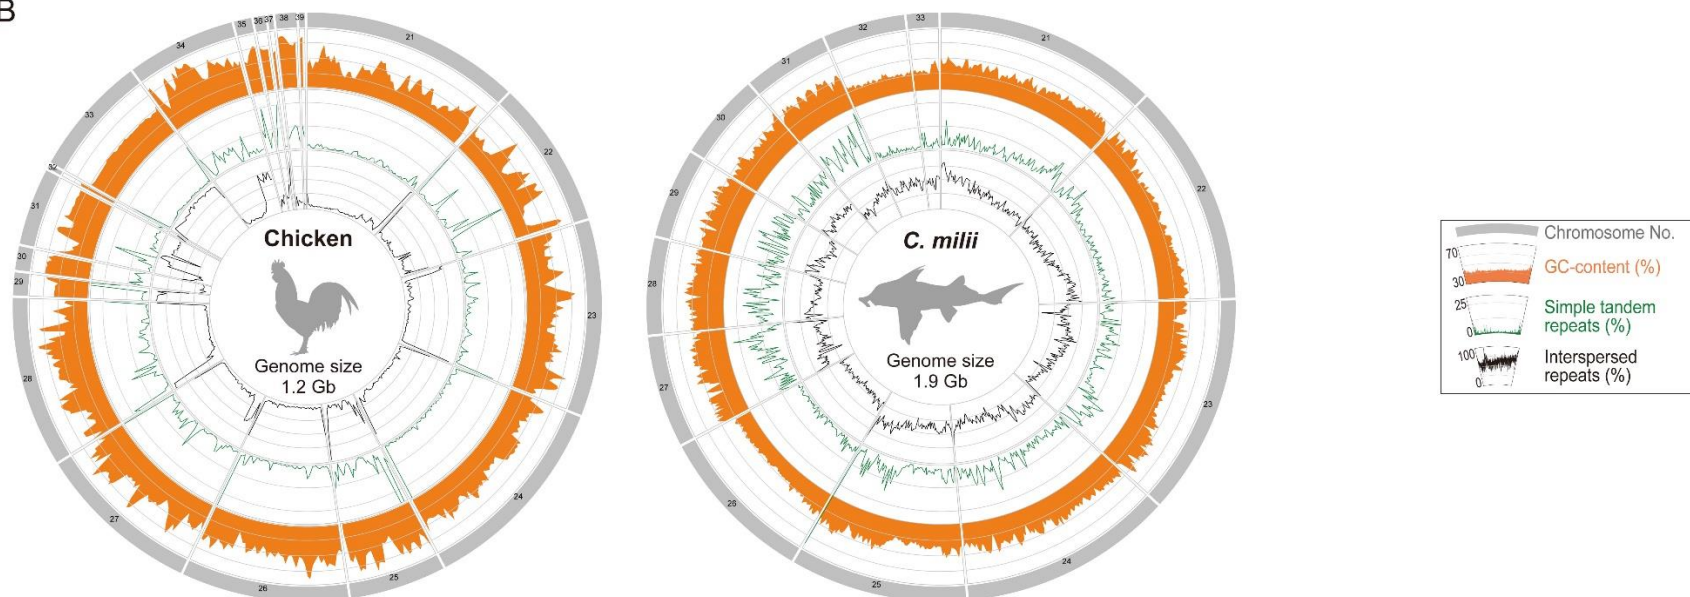

**Supplementary Figure 1.** Chromosomal sequence characterization for selected vertebrate species. (A) Whole genome views. (B) Views focusing on relatively small chromosomes of the zebra shark and chicken. See Figure 2A for the whole genome views. The orange areas show GC-content (30–70%), while the green and black lines show content of simple tandem repeats (0–25%) and interspersed repeats (0–100%), respectively, in 100-kb-long non-overlapping windows (also see Figure 2A).

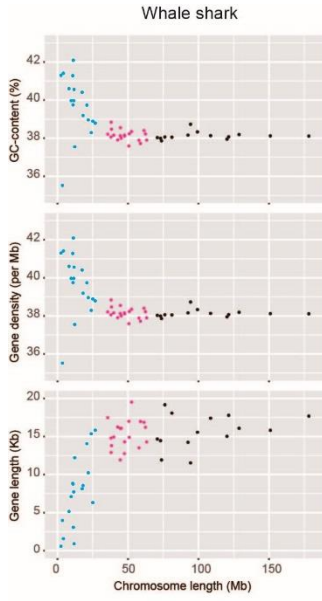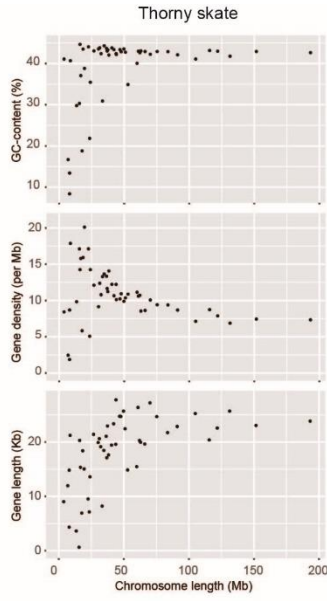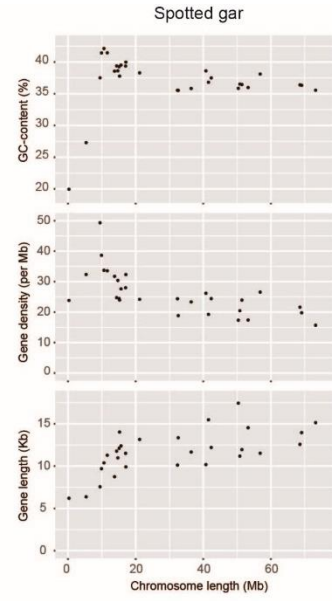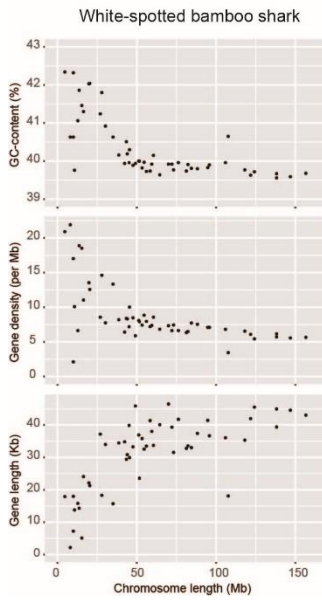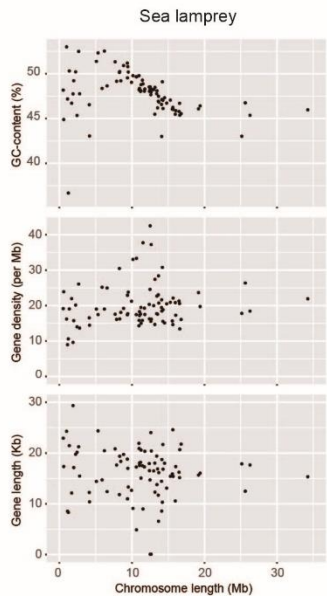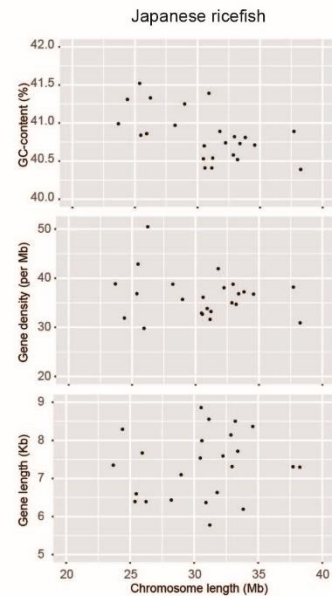

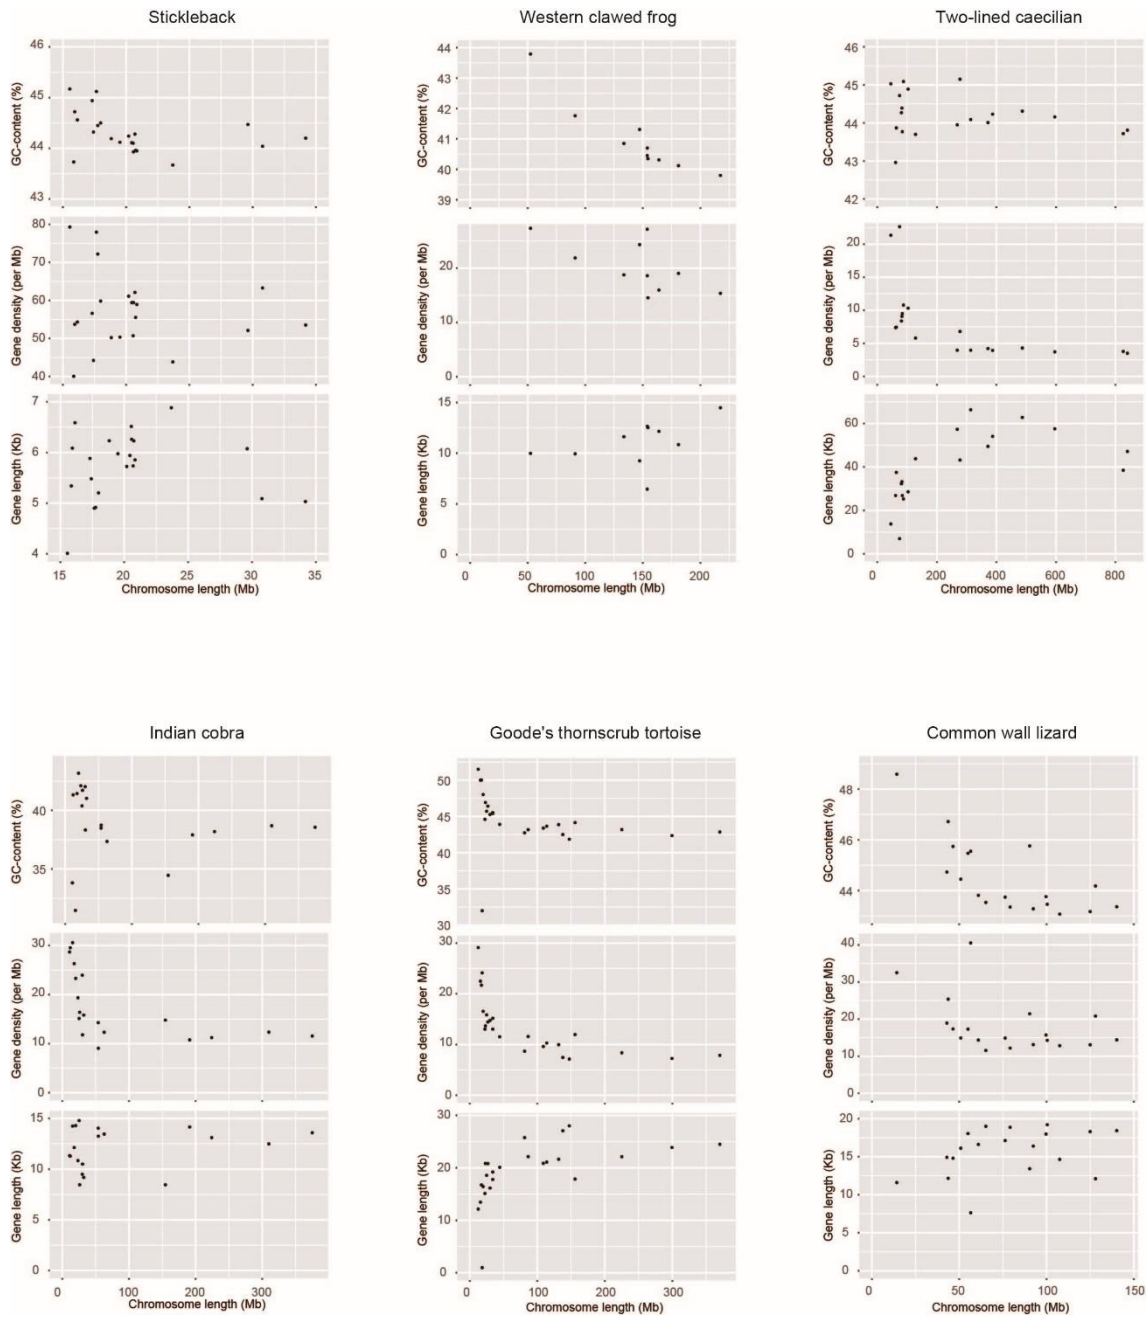

**Supplementary Figure 2.** Two-dimensional plot of GC-content and median values of gene length, gene density, and the number of synonymous substitutions per synonymous site ( $K_s$ ) for protein-coding genes on individual chromosomes. See Methods for statistical tests for correlation of these features with chromosome length.

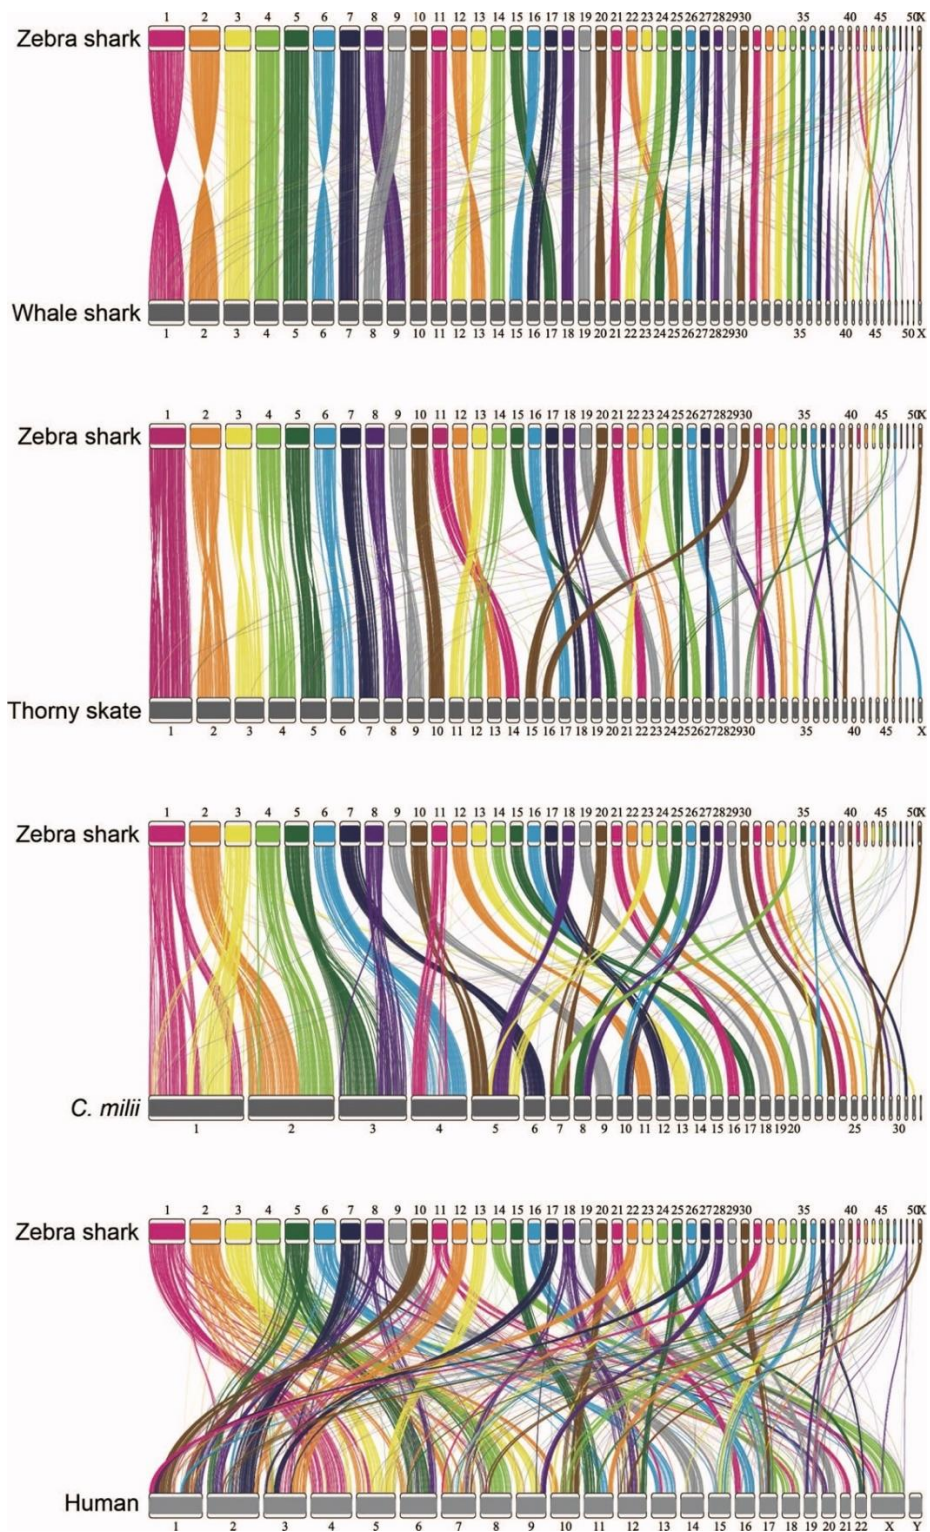

**Supplementary Figure 3.** Chromosomal homology between the zebra shark and other vertebrates. Conserved synteny is visualized with the inter-specific correspondence of one-to-one orthologs (see Methods).

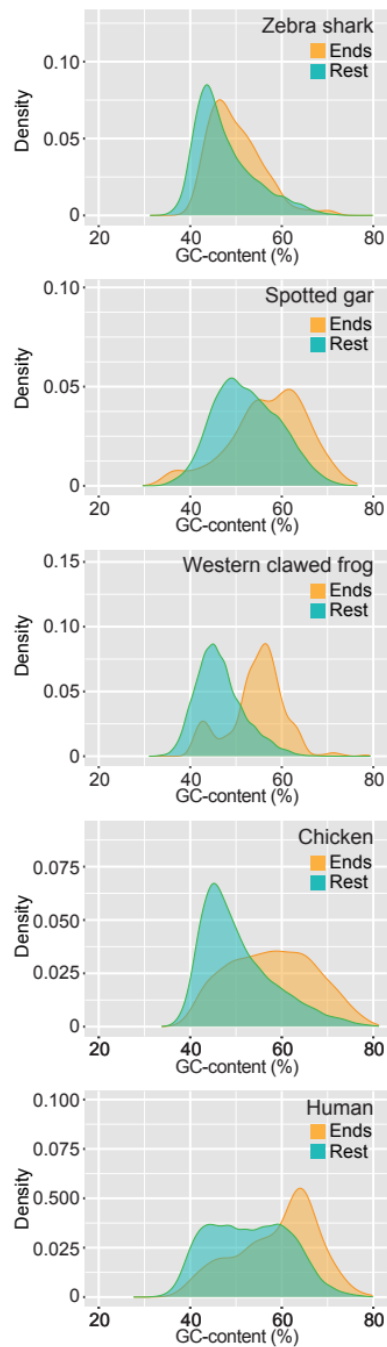

**Supplementary Figure 4.** Intrachromosomal heterogeneity of GC-content in protein-coding regions of individual predicted genes. GC-content of protein-coding genes is compared between 1 Mb ends of relatively large chromosomes and their remainders for different size categories of chromosomes.

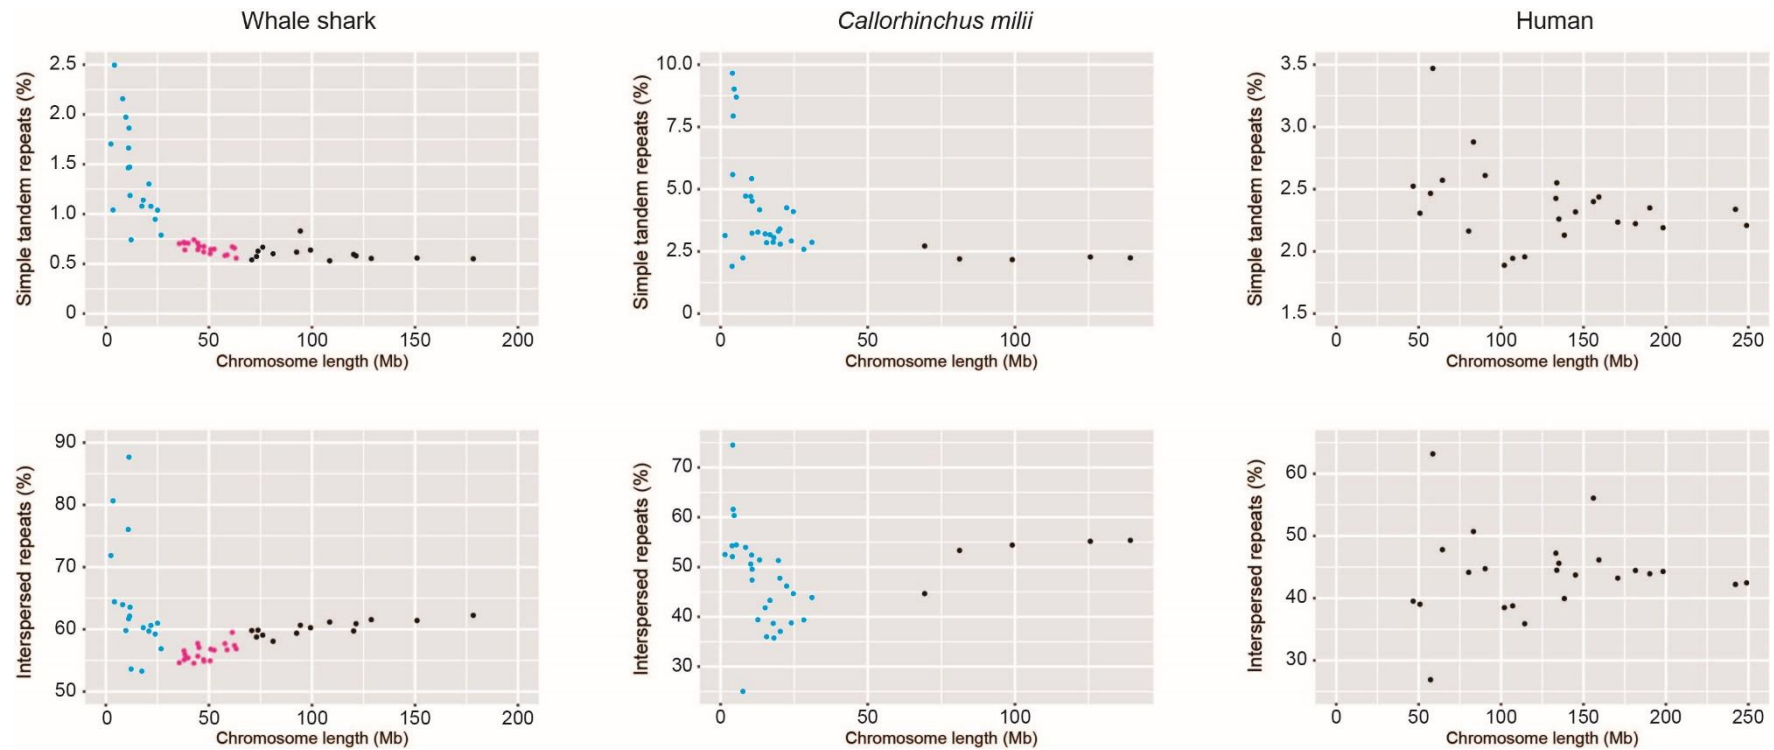

**Supplementary Figure 5.** Two-dimensional plots of chromosome lengths and the coverage of interspersed repeats and simple tandem repeats. See Methods and Supplementary Table 3 for more details about statistical tests.

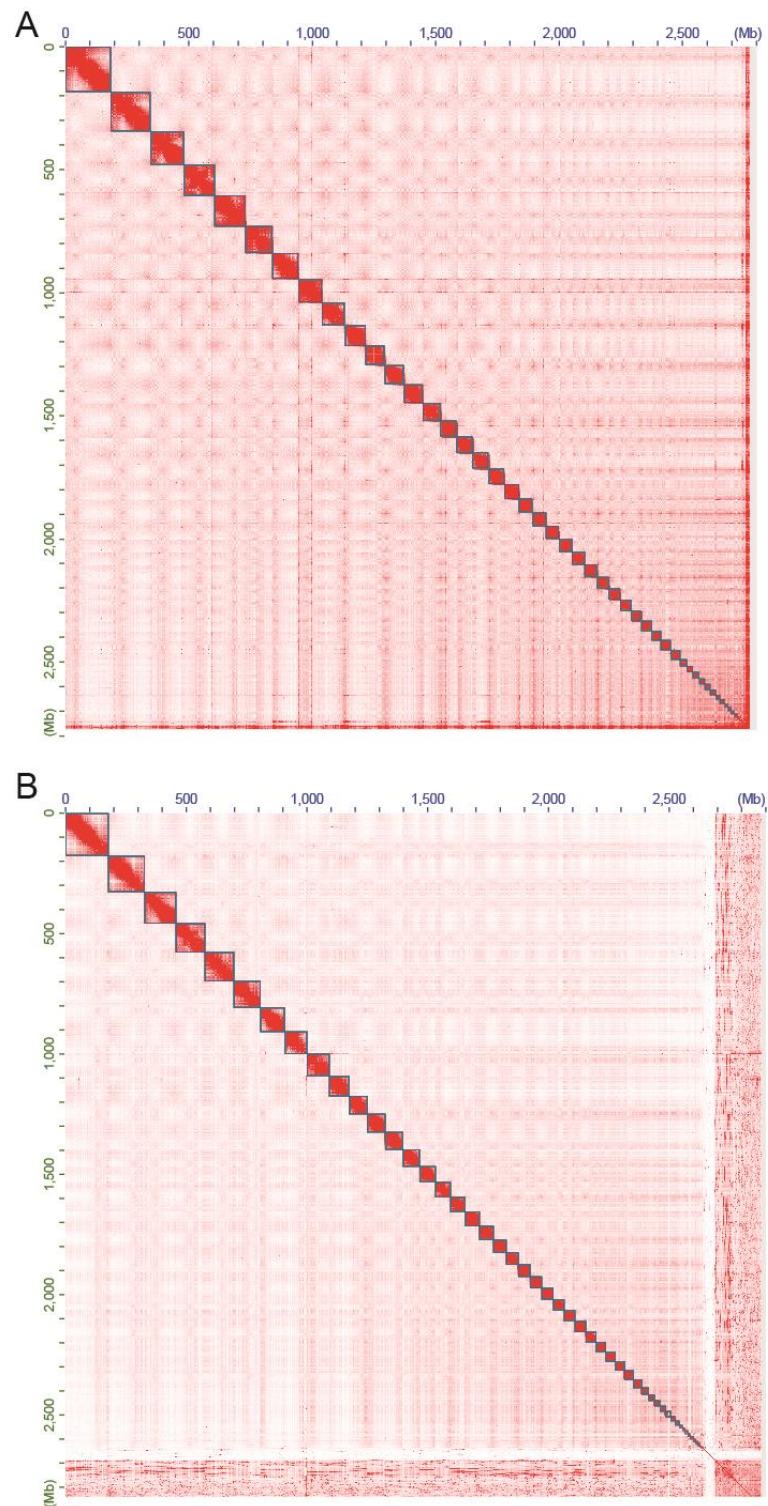

**Supplementary Figure 6.** Chromatin contact heatmap based on Hi-C data. (A) Zebra shark. (B) Whale shark. Color intensities correspond to the frequency of chromatin contacts detected by Hi-C data (see Methods for details).



**Supplementary Table 1.** Comparative statistics of the newly obtained and previously released elasmobranch genome assemblies.

| Species                                                        | Zebra shark        |               | White-spotted bamboo shark       |               | Brownbanded bamboo shark |               | White shark        |               | Thorny skate                        |               |
|----------------------------------------------------------------|--------------------|---------------|----------------------------------|---------------|--------------------------|---------------|--------------------|---------------|-------------------------------------|---------------|
| Assembly Name                                                  | sSteFas1.1         |               | ASM401019v2<br>(GCF_004010195.1) |               | Cpunctatum_v2.1          |               | GCA_003604245.1    |               | sAmbRad1.1.pri<br>(GCF_010909765.2) |               |
| Type                                                           | Genome             | Gene model    | Genome                           | Gene model    | Genome                   | Gene model    | Genome             | Gene model    | Genome                              | Gene model    |
| Selected program                                               | BUSCO_v5           | BUSCO_v5      | BUSCO_v5                         | BUSCO_v5      | BUSCO_v5                 | BUSCO_v5      | BUSCO_v5           | BUSCO_v5      | BUSCO_v5                            | BUSCO_v5      |
| Selected reference gene set                                    | Vertebrata         | Vertebrata    | Vertebrata                       | Vertebrata    | Vertebrata               | Vertebrata    | Vertebrata         | Vertebrata    | Vertebrata                          | Vertebrata    |
| <b># of core Complete</b>                                      | 3039 (90.61%)      | 3012 (89.80%) | 3012 (89.80%)                    | 3169 (94.48%) | 2933 (87.45%)            | 2947 (87.87%) | 3075 (91.68%)      | 1560 (46.51%) | 3052 (91.00%)                       | 3195 (95.26%) |
| <b>genes detected Complete + Fragmented</b>                    | 3204 (95.53%)      | 3206 (95.59%) | 3187 (95.02%)                    | 3263 (97.29%) | 3155 (94.07%)            | 3155 (94.07%) | 3214 (95.83%)      | 2243 (66.88%) | 3162 (94.28%)                       | 3236 (96.48%) |
| <b># of missing core genes</b>                                 | 150 (4.47%)        | 148 (4.41%)   | 167 (4.98%)                      | 91 (2.71%)    | 199 (5.93%)              | 199 (5.93%)   | 140 (4.17%)        | 1111 (33.12%) | 192 (5.72%)                         | 118 (3.52%)   |
| <b>Average # of orthologs per core genes</b>                   | 1.03               | 1.09          | 1.03                             | 2.37          | 1.02                     | 1.04          | 1.04               | 1.04          | 1.03                                | 2.15          |
| <b>% of detected core genes that have more than 1 ortholog</b> | 2.34               | 7.9           | 1.93                             | 52.57         | 1.91                     | 2.75          | 2.57               | 3.27          | 2.23                                | 49.39         |
| <b># of sequences</b>                                          | 1266               | 33222         | 101977                           | 47685         | 125458                   | 33501         | 9222               | 24520         | 957                                 | 38895         |
| <b>Total length (nt/aa)</b>                                    | 2771866316         | 13169207      | 3556477427                       | 31931996      | 3441189827               | 12025038      | 3915280839         | 8641475       | 2558784953                          | 28873284      |
| <b>Longest sequence (nt/aa)</b>                                | 187018787          | 30503         | 156605281                        | 38279         | 56086953                 | 8400          | 23593172           | 11289         | 193168304                           | 35076         |
| <b>Shortest sequence (nt/aa)</b>                               | 5000               | 5             | 1000                             | 31            | 500                      | 30            | 10005              | 51            | 1363                                | 31            |
| <b>Mean sequence length (nt/aa)</b>                            | 2189468            | 396           | 34875                            | 670           | 27429                    | 359           | 424559             | 352           | 2673756                             | 742           |
| <b>Median sequence length (nt/aa)</b>                          | 6877               | 251           | 1621                             | 482           | 936                      | 214           | 51597              | 243           | 51440                               | 507           |
| <b>N50 sequence length (nt)</b>                                | 76588082           |               | 73167256                         |               | 9192170                  |               | 2991981            |               | 62052929                            |               |
| <b>L50 sequence count</b>                                      | 13                 |               | 17                               |               | 90                       |               | 330                |               | 13                                  |               |
| <b># of sequences &gt; 1Kb</b>                                 | 1266 (100.0%)      |               | 101512 (99.5%)                   |               | 58399 (46.5%)            |               | 9222 (100.0%)      |               | 957 (100.0%)                        |               |
| <b># of sequences &gt; 10Kb</b>                                | 337 (26.6%)        |               | 10379 (10.2%)                    |               | 3085 (2.5%)              |               | 9222 (100.0%)      |               | 945 (98.7%)                         |               |
| <b># of sequences &gt; 100Kb</b>                               | 59 (4.7%)          |               | 100 (0.1%)                       |               | 1253 (1.0%)              |               | 3312 (35.9%)       |               | 245 (25.6%)                         |               |
| <b># of sequences &gt; 1Mb</b>                                 | 50 (3.9%)          |               | 52 (0.1%)                        |               | 495 (0.4%)               |               | 888 (9.6%)         |               | 64 (6.7%)                           |               |
| <b># of sequences &gt; 10Mb</b>                                | 45 (3.6%)          |               | 47 (0.0%)                        |               | 82 (0.1%)                |               | 34 (0.4%)          |               | 45 (4.7%)                           |               |
| <b>Sum length of sequences &gt; 1Mb (bp)</b>                   | 2756734042 (99.5%) |               | 3104319730 (87.3%)               |               | 2965606038 (86.2%)       |               | 2920922205 (74.6%) |               | 2482724239 (97.0%)                  |               |
| <b>Sum length of sequences &gt; 10Mb (bp)</b>                  | 2723511891 (98.3%) |               | 3069888471 (86.3%)               |               | 1650831574 (48.0%)       |               | 460085648 (11.8%)  |               | 2407838606 (94.1%)                  |               |
| <b>GC-content (%)</b>                                          | 41.78              |               | 42.06                            |               | 41.79                    |               | 43.87              |               | 44.3                                |               |
| <b># of gaps (&gt;=5 Ns)</b>                                   | 86090              |               | 155015                           |               | 443025                   |               | 173480             |               | 3749                                |               |

Completeness of gene models were assessed using peptide sequences of predicted genes.

**Supplementary Table 2.** Comparative statistics of the newly obtained and previously released whale shark genome assemblies.

| Assembly                                                                       | sRhiTyp1.1 (this study) |               | Rtypus_kobe_v1.0 |               | RhiTyp_1.0_HiC<br>(DNA ZOO) | GCA_001642345.3 ASM164234v3<br>(Tan et al., 2021) | GCF_001642345.1 ASM164234v2 | GCA_013626285.1 RhiTyp_1.0<br>(Weber et al., 2020) |                    |
|--------------------------------------------------------------------------------|-------------------------|---------------|------------------|---------------|-----------------------------|---------------------------------------------------|-----------------------------|----------------------------------------------------|--------------------|
| Type                                                                           | Genome                  | Gene model    | Genome           | Gene model    | Genome                      | Genome                                            | Genome                      | Gene model                                         | Genome             |
| <b>Selected program</b>                                                        | BUSCO_v5                | BUSCO_v5      | BUSCO_v5         | BUSCO_v5      | BUSCO_v5                    | BUSCO_v5                                          | BUSCO_v5                    | BUSCO_v5                                           | BUSCO_v5           |
| <b>Selected reference gene set</b>                                             | Vertebrata              | Vertebrata    | Vertebrata       | Vertebrata    | Vertebrata                  | Vertebrata                                        | Vertebrata                  | Vertebrata                                         | Vertebrata         |
| <b># of core Complete genes detected</b>                                       | 2565 (76.48%)           | 2609 (77.79%) | 2605 (77.67%)    | 2663 (79.40%) | 3088 (92.07%)               | 2779 (82.86%)                                     | 2630 (78.41%)               | 2758 (82.23%)                                      | 3069 (91.50%)      |
| <b># of missing core genes</b>                                                 | 3080 (91.83%)           | 3084 (91.95%) | 3068 (91.47%)    | 3071 (91.56%) | 3219 (95.97%)               | 3125 (93.17%)                                     | 3103 (92.52%)               | 3176 (94.69%)                                      | 3217 (95.92%)      |
| <b>Average # of orthologs per % of detected core genes that # of sequences</b> | 274 (8.17%)             | 270 (8.05%)   | 286 (8.53%)      | 283 (8.44%)   | 135 (4.03%)                 | 229 (6.83%)                                       | 251 (7.48%)                 | 178 (5.31%)                                        | 137 (4.08%)        |
| <b>Total length (nt/aa)</b>                                                    | 1.03                    | 1.1           | 1.03             | 1.03          | 1.03                        | 1.03                                              | 1.03                        | 1.45                                               | 1.03               |
| <b>Longest sequence (nt/aa)</b>                                                | 2.57                    | 8.85          | 1.92             | 2.67          | 2.62                        | 2.12                                              | 2.24                        | 26.14                                              | 2.61               |
| <b>Shortest sequence (nt/aa)</b>                                               | 16776                   | 36824         | 155537           | 27005         | 133476                      | 39171                                             | 57334                       | 27896                                              | 136451             |
| <b>Mean sequence length (nt/aa)</b>                                            | 2881325413              | 12601623      | 2659892559       | 9576545       | 2822097320                  | 2961781270                                        | 2931599576                  | 13150867                                           | 2820592179         |
| <b>Median sequence length</b>                                                  | 178270547               | 34351         | 3410558          | 22026         | 182888402                   | 2759877                                           | 1482643                     | 23396                                              | 16092075           |
| <b>N50 sequence length (nt)</b>                                                | 5000                    | 5             | 500              | 3             | 200                         | 666                                               | 1000                        | 31                                                 | 200                |
| <b>L50 sequence count</b>                                                      | 171750                  | 342           | 17101            | 355           | 21143                       | 75612                                             | 51132                       | 471                                                | 20671              |
| <b># of sequences &gt; 1K (nt)</b>                                             | 8723                    | 211           | 1809             | 229           | 385                         | 12614                                             | 15389                       | 354                                                | 401                |
| <b># of sequences &gt; 10K (nt)</b>                                            | 70795558                |               | 325616           |               | 70985326                    | 344655                                            | 144422                      |                                                    | 3127311            |
| <b># of sequences &gt; 100K (nt)</b>                                           | 14                      |               | 2117             |               | 14                          | 2425                                              | 5485                        |                                                    | 238                |
| <b># of sequences &gt; 1M (nt)</b>                                             | 16776                   |               | 118303           |               | 28321 (21.2%)               | 39167 (100.0%)                                    | 57333 (100.0%)              |                                                    | 31297 (22.9%)      |
| <b># of sequences &gt; 10M (nt)</b>                                            | (100.0%)                |               | (76.1%)          |               | 1105 (0.8%)                 | 24329 (62.1%)                                     | 39558 (69.0%)               |                                                    | 4101 (3.0%)        |
| <b>Sum length of sequences &gt; 1M (nt)</b>                                    | 6359 (37.9%)            |               | 13782 (8.9%)     |               | 84 (0.1%)                   | 7248 (18.5%)                                      | 8565 (14.9%)                |                                                    | 1823 (1.3%)        |
| <b>Sum length of sequences &gt; 10M (nt)</b>                                   | 241 (1.4%)              |               | 6132 (3.9%)      |               | 51 (0.0%)                   | 214 (0.5%)                                        | 10 (0.0%)                   |                                                    | 690 (0.5%)         |
| <b>GC-content (%)</b>                                                          | 51 (0.3%)               |               | 221 (0.1%)       |               | 47 (0.0%)                   | 0 (0.0%)                                          | 0 (0.0%)                    |                                                    | 24 (0.0%)          |
| <b># of gaps (&gt;=5 N's)</b>                                                  | 46 (0.3%)               |               | 0 (0.0%)         |               | 2691409604                  | 274947285 (9.3%)                                  | 11332151 (0.4%)             |                                                    | 2226036735 (78.9%) |
|                                                                                | 2639639612              |               | 306535345        |               | (95.4%)                     |                                                   |                             |                                                    |                    |
|                                                                                | (91.6%)                 |               | (11.5%)          |               | 2674204998                  | 0 (0.0%)                                          | 0 (0.0%)                    |                                                    | 295806019 (10.5%)  |
|                                                                                | 2611710806              |               | 0 (0.0%)         |               | (94.8%)                     |                                                   |                             |                                                    |                    |
|                                                                                | (90.6%)                 |               |                  |               | 41.74                       | 41.77                                             | 41.78                       |                                                    | 41.74              |
|                                                                                | 41.51                   |               | 40.83            |               | 41.74                       | 41.77                                             | 41.78                       |                                                    | 41.74              |
|                                                                                | 95171                   |               | 180448           |               | 59795                       | 15895                                             | 10                          |                                                    | 56773              |

Completeness of gene models were assessed using peptide sequences of predicted genes.

Supplementary Table 3. Statistical tests for correlation with chromosome length.

**A. Zebra shark**

|                                     | GC-content                 | Gene length                 | Gene density               | Ks                          | Simple tandem repeats      | Interspersed repeats        |
|-------------------------------------|----------------------------|-----------------------------|----------------------------|-----------------------------|----------------------------|-----------------------------|
| Correlation coefficient             | -0.5716                    | 0.7572                      | -0.5777                    | -0.3979                     | -0.6138                    | 0.4840                      |
| Interpretation                      | Moderate Negative          | Strong Positive             | Moderate Negative          | Weak Negative               | Moderate Negative          | Moderate Positive           |
| Logarithmic approximation           | $y = -0.45\ln(x) + 41.122$ | $y = 10.626\ln(x) - 10.991$ | $y = -8.42\ln(x) + 45.982$ | $y = -0.027\ln(x) + 0.1891$ | $y = -0.78\ln(x) + 3.9934$ | $y = 1.5193\ln(x) + 52.433$ |
| Coefficient of determination, $R^2$ | 0.3527                     | 0.8378                      | 0.5674                     | 0.3281                      | 0.7442                     | 0.1799                      |
| p-value                             | 1.455E-05                  | 1.970E-10                   | 1.120E-05                  | 4.216E-03                   | 2.134E-06                  | 3.697E-04                   |
| Significance of difference          | **                         | **                          | **                         | **                          | **                         | **                          |

**B. Callorhynchus milii**

|                                     | GC-content                  | Gene length                 | Gene density                | Ks                          | Simple tandem repeats       | Interspersed repeats        |
|-------------------------------------|-----------------------------|-----------------------------|-----------------------------|-----------------------------|-----------------------------|-----------------------------|
| Correlation coefficient             | -0.4354                     | 0.7554                      | -0.5548                     | -0.4487                     | -0.4308                     | 0.1205                      |
| Interpretation                      | Moderate Negative           | Strong Positive             | Moderate Negative           | Moderate Negative           | Moderate Negative           | No                          |
| Logarithmic approximation           | $y = -1.431\ln(x) + 47.824$ | $y = 2.4301\ln(x) + 4.2049$ | $y = -6.936\ln(x) + 47.866$ | $y = -0.086\ln(x) + 0.5379$ | $y = -1.101\ln(x) + 6.9893$ | $y = -1.712\ln(x) + 52.778$ |
| Coefficient of determination, $R^2$ | 0.3161                      | 0.733                       | 0.4115                      | 0.4667                      | 0.3202                      | 0.0378                      |
| p-value                             | 1.132E-02                   | 3.760E-07                   | 8.069E-04                   | 9.997E-03                   | 1.233E-02                   | 5.041E-01                   |
| Significance of difference          | *                           | **                          | **                          | **                          | *                           | n.s.                        |

**C. Chicken**

|                                     | GC contents                 | Gene length                 | Gene density                | Ks                          | Simple tandem repeats       | Interspersed repeats        |
|-------------------------------------|-----------------------------|-----------------------------|-----------------------------|-----------------------------|-----------------------------|-----------------------------|
| Correlation coefficient             | -0.5373                     | 0.6696                      | -0.5099                     | -0.2691                     | -0.2832                     | -0.1998                     |
| Interpretation                      | Moderate Negative           | Moderate Positive           | Moderate Negative           | Weak Negative               | Weak Negative               | No                          |
| Logarithmic approximation           | $y = -2.947\ln(x) + 53.947$ | $y = 1.3267\ln(x) + 5.0556$ | $y = -16.06\ln(x) + 85.579$ | $y = -0.085\ln(x) + 0.4454$ | $y = -1.126\ln(x) + 5.6236$ | $y = -6.328\ln(x) + 32.726$ |
| Coefficient of determination, $R^2$ | 0.6117                      | 0.5632                      | 0.6847                      | 0.2626                      | 0.4856                      | 0.2329                      |
| p-value                             | 2.919E-04                   | 1.687E-06                   | 6.609E-04                   | 1.125E-01                   | 7.282E-02                   | 2.103E-01                   |
| Significance of difference          | **                          | **                          | **                          | n.s.                        | n.s.                        | n.s.                        |

**D. Human**

|                                     | GC contents                 | Gene length                 | Gene density                | Ks                          | Simple tandem repeats       | Interspersed repeats        |
|-------------------------------------|-----------------------------|-----------------------------|-----------------------------|-----------------------------|-----------------------------|-----------------------------|
| Correlation coefficient             | 0.1676                      | 0.4945                      | -0.2824                     | -0.5869                     | -0.3439                     | 0.0465                      |
| Interpretation                      | No                          | Moderate Positive           | Weak Negative               | Moderate Negative           | Weak Negative               | No                          |
| Logarithmic approximation           | $y = 2.1872\ln(x) + 28.093$ | $y = 4.0045\ln(x) - 4.3211$ | $y = -3.654\ln(x) + 30.186$ | $y = -0.063\ln(x) + 0.4389$ | $y = -0.265\ln(x) + 3.6278$ | $y = 0.9987\ln(x) + 39.123$ |
| Coefficient of determination, $R^2$ | 0.0389                      | 0.2628                      | 0.0957                      | 0.4461                      | 0.1577                      | 0.0051                      |
| p-value                             | 4.336E-01                   | 1.404E-02                   | 1.812E-01                   | 2.570E-03                   | 9.988E-02                   | 8.290E-01                   |
| Significance of difference          | n.s.                        | *                           | n.s.                        | **                          | n.s.                        | n.s.                        |

**E. Whale shark**

|                                     | GC-content                  | Gene length                 | Gene density                | Ks                          | Simple tandem repeats       | Interspersed repeats        |
|-------------------------------------|-----------------------------|-----------------------------|-----------------------------|-----------------------------|-----------------------------|-----------------------------|
| Correlation coefficient             | -0.4612                     | 0.6327                      | -0.5988                     | -0.4118                     | -0.6325                     | -0.1986                     |
| Interpretation                      | Moderate Negative           | Moderate Positive           | Moderate Negative           | Moderate Negative           | Moderate Negative           | No                          |
| Logarithmic approximation           | $y = -0.694\ln(x) + 41.165$ | $y = 6.7389\ln(x) - 2.4441$ | $y = -5.853\ln(x) + 35.247$ | $y = -0.029\ln(x) + 0.1931$ | $y = -0.389\ln(x) + 2.2918$ | $y = -3.121\ln(x) + 71.304$ |
| Coefficient of determination, $R^2$ | 0.3289                      | 0.7284                      | 0.5623                      | 0.3722                      | 0.6757                      | 0.2329                      |
| p-value                             | 6.586E-04                   | 6.335E-07                   | 3.454E-06                   | 2.677E-03                   | 6.389E-07                   | 1.624E-01                   |
| Significance of difference          | **                          | **                          | **                          | **                          | **                          | n.s.                        |

The tests A-D were performed for Figures 2B, 4D and Supplementary Figure 5, while those in E-P were performed for Supplementary Figure 2. Correlation coefficients in the range between  $\pm 0.0$  and  $\pm 0.2$  indicate no correlation,  $\pm 0.2$  to  $\pm 0.4$  indicate weak positive/negative correlation,  $\pm 0.4$  to  $\pm 0.7$  indicate moderate positive/negative correlation, and  $\pm 0.7$  to  $\pm 1.0$  indicate strong positive/negative correlation. The results are showed in the "Interpretation" columns.  $R^2$  values approaching 1 indicate high linearity. Significance of difference was represented as an asterisk in the correlation coefficients: \*, p-value < 0.05; \*\*, p-value < 0.01; n.s., not significant.

**F. White-spotted bamboo shark**

|                                     | GC-content                  | Gene length                 | Gene density               |
|-------------------------------------|-----------------------------|-----------------------------|----------------------------|
| Correlation coefficient             | -0.6753                     | 0.6873                      | -0.6057                    |
| Interpretation                      | Moderate Negative           | Moderate Positive           | Moderate Negative          |
| Logarithmic approximation           | $y = -0.719\ln(x) + 43.077$ | $y = 10.576\ln(x) - 9.4156$ | $y = -3.56\ln(x) + 22.489$ |
| Coefficient of determination, $R^2$ | 0.9941                      | 0.6354                      | 0.5125                     |
| p-value                             | 5.463E-08                   | 2.544E-08                   | 2.487E-06                  |
| Significance of difference          | **                          | **                          | **                         |

**G. Thorny skate**

|                                     | GC-content                  | Gene length                 | Gene density                |
|-------------------------------------|-----------------------------|-----------------------------|-----------------------------|
| Correlation coefficient             | 0.3841                      | 0.5412                      | -0.3419                     |
| Interpretation                      | Weak Positive               | Moderate Positive           | Weak Negative               |
| Logarithmic approximation           | $y = 5.7015\ln(x) + 18.312$ | $y = 5.1051\ln(x) + 0.0208$ | $y = -0.763\ln(x) + 13.479$ |
| Coefficient of determination, $R^2$ | 0.3098                      | 0.4309                      | 0.0315                      |
| p-value                             | 6.443E-03                   | 5.939E-05                   | 1.619E-02                   |
| Significance of difference          | **                          | **                          | *                           |

**H. Sea lamprey**

|                                     | GC-content                  | Gene length                | Gene density                |
|-------------------------------------|-----------------------------|----------------------------|-----------------------------|
| Correlation coefficient             | -0.3119                     | -0.1110                    | 0.1680                      |
| Interpretation                      | Weak Negative               | No                         | No                          |
| Logarithmic approximation           | $y = -0.335\ln(x) + 48.568$ | $y = -0.90\ln(x) + 18.077$ | $y = 1.4659\ln(x) + 16.893$ |
| Coefficient of determination, $R^2$ | 0.0144                      | 0.0236                     | 0.0455                      |
| p-value                             | 3.658E-03                   | 3.120E-01                  | 1.243E-01                   |
| Significance of difference          | **                          | n.s.                       | n.s.                        |

**I. Spotted gar**

|                                     | GC-content                  | Gene length                 | Gene density                |
|-------------------------------------|-----------------------------|-----------------------------|-----------------------------|
| Correlation coefficient             | 0.0287                      | 0.6232                      | -0.6635                     |
| Interpretation                      | No                          | Moderate Positive           | Moderate Negative           |
| Logarithmic approximation           | $y = 1.9528\ln(x) + 30.955$ | $y = 1.6303\ln(x) + 6.6291$ | $y = -2.977\ln(x) + 35.273$ |
| Coefficient of determination, $R^2$ | 0.2534                      | 0.4869                      | 0.2076                      |
| p-value                             | 3.658E-03                   | 3.120E-01                   | 1.243E-01                   |
| Significance of difference          | n.s.                        | **                          | **                          |

**J. Medaka**

|                                     | GC-content                 | Gene length                 | Gene density                |
|-------------------------------------|----------------------------|-----------------------------|-----------------------------|
| Correlation coefficient             | -0.5622                    | 0.1606                      | -0.2008                     |
| Interpretation                      | Moderate Negative          | No                          | Weak Negative               |
| Logarithmic approximation           | $y = -1.422\ln(x) + 45.69$ | $y = 1.0579\ln(x) + 3.7387$ | $y = -6.895\ln(x) + 59.937$ |
| Coefficient of determination, $R^2$ | 0.327                      | 0.0259                      | 0.0406                      |
| p-value                             | 4.241E-03                  | 4.534E-01                   | 3.469E-01                   |
| Significance of difference          | **                         | n.s.                        | n.s.                        |

**K. Stickleback**

|                                     | GC-content                  | Gene length                 | Gene density               |
|-------------------------------------|-----------------------------|-----------------------------|----------------------------|
| Correlation coefficient             | -0.3402                     | 0.0144                      | -0.1206                    |
| Interpretation                      | Weak Negative               | No                          | No                         |
| Logarithmic approximation           | $y = -0.746\ln(x) + 46.546$ | $y = 0.2458\ln(x) + 4.9873$ | $y = -6.06\ln(x) + 75.383$ |
| Coefficient of determination, $R^2$ | 0.1542                      | 0.0061                      | 0.0169                     |
| p-value                             | 1.214E-01                   | 9.493E-01                   | 5.929E-01                  |
| Significance of difference          | n.s.                        | n.s.                        | n.s.                       |

**L. Western clawed frog**

|                                     | GC-content                  | Gene length                 | Gene density                |
|-------------------------------------|-----------------------------|-----------------------------|-----------------------------|
| Correlation coefficient             | -0.9340                     | 0.4344                      | -0.6244                     |
| Interpretation                      | Strong Negative             | Moderate Positive           | Moderate Negative           |
| Logarithmic approximation           | $y = -2.788\ln(x) + 54.646$ | $y = 1.9828\ln(x) + 1.2458$ | $y = -7.254\ln(x) + 55.945$ |
| Coefficient of determination, $R^2$ | 0.9482                      | 0.128                       | 0.3865                      |
| p-value                             | 7.650E-05                   | 2.096E-01                   | 5.366E-02                   |
| Significance of difference          | **                          | n.s.                        | n.s.                        |

**M. Two-lined caecilian**

|                                     | GC-content                  | Gene length                 | Gene density                |
|-------------------------------------|-----------------------------|-----------------------------|-----------------------------|
| Correlation coefficient             | -0.2417                     | 0.5683                      | -0.5862                     |
| Interpretation                      | Weak Negative               | Moderate Positive           | Moderate Negative           |
| Logarithmic approximation           | $y = -0.108\ln(x) + 44.776$ | $y = 12.809\ln(x) - 26.843$ | $y = -4.064\ln(x) + 29.007$ |
| Coefficient of determination, $R^2$ | 0.0334                      | 0.4309                      | 0.5694                      |
| p-value                             | 3.187E-01                   | 1.113E-02                   | 8.351E-03                   |
| Significance of difference          | n.s.                        | *                           | **                          |

**N. Indian cobra**

|                                     | GC-content                 | Gene length                | Gene density                |
|-------------------------------------|----------------------------|----------------------------|-----------------------------|
| Correlation coefficient             | -0.1715                    | 0.2039                     | -0.5474                     |
| Interpretation                      | No                         | Weak Positive              | Moderate Negative           |
| Logarithmic approximation           | $y = -0.437\ln(x) + 40.82$ | $y = 0.313\ln(x) + 10.862$ | $y = -4.768\ln(x) + 36.031$ |
| Coefficient of determination, $R^2$ | 0.0252                     | 0.0282                     | 0.5702                      |
| p-value                             | 4.826E-01                  | 4.024E-01                  | 1.528E-02                   |
| Significance of difference          | n.s.                       | n.s.                       | *                           |

**O. Goode's thornscrub tortoise**

|                                     | GC-content                  | Gene length                | Gene density                |
|-------------------------------------|-----------------------------|----------------------------|-----------------------------|
| Correlation coefficient             | -0.3186                     | 0.5463                     | -0.6520                     |
| Interpretation                      | Weak Negative               | Moderate Positive          | Moderate Negative           |
| Logarithmic approximation           | $y = -1.473\ln(x) + 50.446$ | $y = 3.785\ln(x) + 4.1224$ | $y = -4.696\ln(x) + 32.402$ |
| Coefficient of determination, $R^2$ | 0.1653                      | 0.4812                     | 0.6983                      |
| p-value                             | 1.292E-01                   | 5.752E-03                  | 5.557E-04                   |
| Significance of difference          | n.s.                        | **                         | **                          |

**P. Common wall lizard**

|                                     | GC-content                  | Gene length                | Gene density                |
|-------------------------------------|-----------------------------|----------------------------|-----------------------------|
| Correlation coefficient             | -0.7173                     | 0.3581                     | -0.4530                     |
| Interpretation                      | Strong Negative             | Weak Positive              | Moderate Negative           |
| Logarithmic approximation           | $y = -2.256\ln(x) + 54.074$ | $y = 2.427\ln(x) + 5.3606$ | $y = -7.508\ln(x) + 50.022$ |
| Coefficient of determination, $R^2$ | 0.6844                      | 0.1728                     | 0.2899                      |
| p-value                             | 5.467E-04                   | 1.322E-01                  | 5.143E-02                   |
| Significance of difference          | **                          | n.s.                       | n.s.                        |

**Supplementary Table 4.** Statistical tests for the inter- and intra-chromosomal comparisons of sequence trends.

**A. Zebra shark**

|                                                                              | GC-content | Gene length | Gene density | $K_s$     | Simple tandem repeats | Interspersed repeats |
|------------------------------------------------------------------------------|------------|-------------|--------------|-----------|-----------------------|----------------------|
| <i>p</i> -value (Kruskal-Wallis test)                                        | 0.0000     | 2.277E-174  | 1.043E-05    | 1.210E-39 | 6.474E-07             | 1.665E-05            |
| Significance of difference                                                   | **         | **          | **           | **        | **                    | **                   |
| eMAC-End vs eMAC-Rest <i>p</i> -value (Mann-Whitney <i>U</i> test)           | 8.490E-17  | 1.549E-01   | 1.750E-01    | 6.814E-02 | 2.594E-04             | 1.019E-03            |
| Significance of difference                                                   | **         | n.s.        | n.s.         | n.s.      | **                    | **                   |
| eMAC-End vs eMAC-Rest rank-biserial correlation (Mann-Whitney <i>U</i> test) | 0.272      | -0.046      | 0.306        | 0.151     | 0.816                 | 0.735                |
| Effect                                                                       | Small      | N/A         | Medium       | Small     | Large                 | Large                |
| eMAC-End vs eMIC <i>p</i> -value (Mann-Whitney <i>U</i> test)                | 1.111E-16  | 1.295E-09   | 1.750E-04    | 7.503E-02 | 6.547E-03             | 4.729E-05            |
| Significance of difference                                                   | **         | **          | **           | n.s.      | *                     | **                   |
| eMAC-End vs eMIC rank-biserial correlation (Mann-Whitney <i>U</i> test)      | -0.275     | 0.201       | -0.798       | -0.150    | -0.580                | 0.866                |
| Effect                                                                       | Small      | Small       | Large        | Small     | Large                 | Large                |
| eMAC-Rest vs eMIC <i>p</i> -value (Mann-Whitney <i>U</i> test)               | 0          | 8.648E-176  | 3.353E-05    | 1.811E-40 | 2.554E-06             | 1.464E-02            |
| Significance of difference                                                   | **         | **          | **           | **        | **                    | *                    |
| eMAC-Rest vs eMIC rank-biserial correlation (Mann-Whitney <i>U</i> test)     | -0.458     | 0.249       | -0.882       | -0.264    | -1.000                | 0.521                |
| Effect                                                                       | Medium     | Small       | Large        | Small     | Large                 | Large                |

**B. Chicken**

|                                                                            | GC-content | Gene length | Gene density | $K_s$      | Simple tandem repeats | Interspersed repeats |
|----------------------------------------------------------------------------|------------|-------------|--------------|------------|-----------------------|----------------------|
| <i>p</i> -value (Kruskal-Wallis test)                                      | 0.0000     | 2.520E-269  | 1.292E-05    | 7.531E-133 | 8.663E-05             | 1.651E-03            |
| Significance of difference                                                 | **         | **          | **           | **         | **                    | **                   |
| MAC-End vs MAC-Rest <i>p</i> -value (Mann-Whitney <i>U</i> test)           | 2.547E-109 | 2.828E-45   | 1.827E-04    | 3.617E-37  | 1.827E-04             | 5.828E-04            |
| Significance of difference                                                 | **         | **          | **           | **         | **                    | **                   |
| MAC-End vs MAC-Rest rank-biserial correlation (Mann-Whitney <i>U</i> test) | 0.455      | -0.289      | 1.000        | 0.390      | 1.000                 | 0.920                |
| Effect                                                                     | Medium     | Small       | Large        | Medium     | Large                 | Large                |
| MAC-End vs MIC <i>p</i> -value (Mann-Whitney <i>U</i> test)                | 1.588E-02  | 3.303E-01   | 4.344E-01    | 3.005E-01  | 1.343E-02             | 5.642E-03            |
| Significance of difference                                                 | *          | n.s.        | n.s.         | n.s.       | *                     | *                    |
| MAC-End vs MIC rank-biserial correlation (Mann-Whitney <i>U</i> test)      | 0.050      | 0.020       | 0.181        | 0.035      | 0.562                 | 0.629                |
| Effect                                                                     | N/A        | N/A         | Small        | N/A        | Large                 | Large                |
| MAC-Rest vs MIC <i>p</i> -value (Mann-Whitney <i>U</i> test)               | 0          | 1.770E-258  | 1.006E-05    | 4.761E-109 | 2.516E-03             | 3.005E-01            |
| Significance of difference                                                 | **         | **          | **           | **         | **                    | n.s.                 |
| MAC-Rest vs MIC rank-biserial correlation (Mann-Whitney <i>U</i> test)     | -0.436     | 0.324       | -1.000       | -0.362     | -0.686                | -0.238               |
| Effect                                                                     | Medium     | Medium      | Large        | Medium     | Large                 | Small                |

The tests were performed for Figure 4B and 4D. Significance of difference was shown with the number of asterisks: \*, *p*-value < 0.05/number of tests; \*\*, *p*-value < 0.01/number of tests; n.s., not significant. Effect size in the range between ±0.0 and ±0.1 indicate no effect, ±0.1 to ±0.3 indicate small effect, ±0.3 to ±0.5 indicate medium effect, and ±0.5 to ±1.0 indicate large effect. N/A, not applicable.

**Supplementary Table 5.** Statistical tests for intragenomic difference of sequence properties in zebra shark.

|                                                              | $K_s$     | $K_a$     | $K_a/K_s$ | GC-content  |
|--------------------------------------------------------------|-----------|-----------|-----------|-------------|
| $p$ -value (Kruskal-Wallis test)                             | 3.590E-51 | 1.174E-03 | 2.273E-06 | 0.000E+00   |
| Significance of difference                                   | **        | **        | **        | **          |
| eMAC vs eMID $p$ -value (Mann-Whitney U test)                | 7.946E-01 | 1.330E-02 | 6.624E-03 | 1.179E-50   |
| Significance of difference                                   | n.s.      | n.s.      | *         | **          |
| eMAC vs eMID rank-biserial correlation (Mann-Whitney U test) | 0.003     | 0.031     | 0.034     | -0.036      |
| Effect                                                       | N/A       | N/A       | N/A       | N/A         |
| eMAC vs eMIC $p$ -value (Mann-Whitney U test)                | 2.195E-47 | 1.600E-02 | 4.097E-07 | 0.000E+00   |
| Significance of difference                                   | **        | n.s.      | **        | **          |
| eMAC vs eMIC rank-biserial correlation (Mann-Whitney U test) | -0.294    | -0.049    | 0.103     | -0.824      |
| Effect                                                       | Small     | N/A       | Small     | Large       |
| eMAC vs X $p$ -value (Mann-Whitney U test)                   | 2.698E-03 | 8.250E-01 | 3.319E-01 | 6.464E-79   |
| Significance of difference                                   | *         | n.s.      | n.s.      | **          |
| eMAC vs X rank-biserial correlation (Mann-Whitney U test)    | 0.221     | 0.016     | -0.072    | -0.988      |
| Effect                                                       | Small     | N/A       | N/A       | Large       |
| eMID vs eMIC $p$ -value (Mann-Whitney U test)                | 2.805E-46 | 1.930E-04 | 8.651E-04 | 0.000E+00   |
| Significance of difference                                   | **        | **        | **        | **          |
| eMID vs eMIC rank-biserial correlation (Mann-Whitney U test) | -0.296    | -0.077    | 0.069     | -0.883      |
| Effect                                                       | Small     | N/A       | N/A       | Large       |
| eMID vs X $p$ -value (Mann-Whitney U test)                   | 3.319E-03 | 8.842E-01 | 1.902E-01 | 3.792E-61   |
| Significance of difference                                   | *         | n.s.      | n.s.      | **          |
| eMID vs X rank-biserial correlation (Mann-Whitney U test)    | 0.217     | -0.011    | -0.097    | -0.992      |
| Effect                                                       | Small     | N/A       | N/A       | Large       |
| eMIC vs X $p$ -value (Mann-Whitney U test)                   | 3.392E-09 | 3.692E-01 | 5.455E-02 | 1.689E-02   |
| Significance of difference                                   | **        | n.s.      | n.s.      | n.s.        |
| eMIC vs X rank-biserial correlation (Mann-Whitney U test)    | 0.447     | 0.068     | -0.145    | -0.997      |
| Effect                                                       | Medium    | N/A       | Small     | Large       |
| eMAC vs PAR $p$ -value (Mann-Whitney U test)                 |           |           |           | 3.10533E-24 |
| Significance of difference                                   |           |           |           | **          |
| eMAC vs PAR rank-biserial correlation (Mann-Whitney U test)  |           |           |           | -0.99951    |
| Effect                                                       |           |           |           | Large       |
| eMID vs PAR $p$ -value (Mann-Whitney U test)                 |           |           |           | 1.814E-23   |
| Significance of difference                                   |           |           |           | **          |
| eMID vs PAR rank-biserial correlation (Mann-Whitney U test)  |           |           |           | -1.000      |
| Effect                                                       |           |           |           | Large       |
| eMIC vs PAR $p$ -value (Mann-Whitney U test)                 |           |           |           | 8.158E-16   |
| Significance of difference                                   |           |           |           | **          |
| eMIC vs PAR rank-biserial correlation (Mann-Whitney U test)  |           |           |           | -1.000      |
| Effect                                                       |           |           |           | Large       |
| X vs PAR $p$ -value (Mann-Whitney U test)                    |           |           |           | 5.022E-17   |
| Significance of difference                                   |           |           |           | **          |
| X vs PAR rank-biserial correlation (Mann-Whitney U test)     |           |           |           | -1.000      |
| Effect                                                       |           |           |           | Large       |

These tests were performed for Figure 5D. Significance of difference was shown with the number of asterisks: \*,  $p$ -value < 0.05/number of tests; \*\*,  $p$ -value < 0.01/number of tests; n.s., not significant. Effect size in the range between  $\pm 0.0$  and  $\pm 0.1$  indicate no effect,  $\pm 0.1$  to  $\pm 0.3$  indicate small effect,  $\pm 0.3$  to  $\pm 0.5$  indicate medium effect, and  $\pm 0.5$  to  $\pm 1.0$  indicate large effect. N/A, not applicable.

**Supplementary Table 6A.** Paired-end libraries prepared for genome sequencing.

| Species                    | Library ID    | Starting total<br>DNA amount<br><br>(ng) | DNA shearing condition |            |             |             |                      |                   | # of PCR<br>cycles<br><br>(cycle) | AMPure XP<br>concentration<br>for size<br>selection | Peak insert<br>length<br><br>(bp) |
|----------------------------|---------------|------------------------------------------|------------------------|------------|-------------|-------------|----------------------|-------------------|-----------------------------------|-----------------------------------------------------|-----------------------------------|
|                            |               |                                          | Machine*               | Peak power | Duty factor | Cycle/Burst | Duration<br>(second) | Times<br>repeated |                                   |                                                     |                                   |
| <i>Rhincodon typus</i>     | P465_01_1**   |                                          |                        |            |             |             |                      |                   |                                   |                                                     | 523                               |
| <i>Rhincodon typus</i>     | P438_01_1     | 100                                      | E220                   | 175        | 10          | 200         | 60                   | 2                 | 4                                 | 2.0x                                                | 280                               |
| <i>Rhincodon typus</i>     | P438_02_1     | 100                                      | E220                   | 175        | 10          | 200         | 60                   | 2                 | 4                                 | 2.0x                                                | 273                               |
| <i>Stegostoma tigrinum</i> | P167_01_3     | 50.00                                    | S220                   | 140        | 10          | 200         | 55                   | 2                 | 3                                 | 1.0x, 0.6x                                          | 228                               |
| <i>Stegostoma tigrinum</i> | P167_12_3     | 238.00                                   | S220                   | 105        | 5           | 200         | 50                   | 3                 | 0                                 | 1.0x, 0.65x                                         | 446                               |
| <i>Stegostoma tigrinum</i> | P377_02_2     | 50.00                                    | E220                   | 140        | 10          | 200         | 180                  | 2                 | 5                                 | 1.0x, 0.5x                                          | 400                               |
| <i>Stegostoma tigrinum</i> | P167_11_4     | 343.80                                   | S220                   | 105        | 5           | 200         | 50                   | 3                 | 0                                 | 0.9x, 0.65x                                         | 689                               |
| <i>Stegostoma tigrinum</i> | P167_01_5     | 50.00                                    | S220                   | 105        | 5           | 200         | 50                   | 3                 | 3                                 | 0.65x, 1.0x                                         | 617                               |
| <i>Stegostoma tigrinum</i> | P167_11_5     | 89.64                                    | S220                   | 105        | 5           | 200         | 50                   | 3                 | 0                                 | 0.65x                                               | 823                               |
| <i>Stegostoma tigrinum</i> | P167_01_4     | 29.16                                    | S220                   | 140        | 10          | 200         | 55                   | 2                 | 5                                 | 0.6x, 0.2x                                          | 366                               |
| <i>Stegostoma tigrinum</i> | P377_02_3***  | 50.00                                    | E220                   | 140        | 10          | 200         | 180                  | 2                 | 6                                 | 1.0x, 0.5x                                          | 436                               |
| <i>Stegostoma tigrinum</i> | P167_11_1     | 381.60                                   | S220                   | 105        | 5           | 200         | 50                   | 3                 | 0                                 | 0.65x, 0.2x                                         | 341                               |
| <i>Stegostoma tigrinum</i> | P167_01_6     | 50.00                                    | S220                   | 105        | 5           | 200         | 50                   | 3                 | 4                                 | 0.6x, 0.3x                                          | 316                               |
| <i>Stegostoma tigrinum</i> | P167_11_2     | 90.72                                    | S220                   | 105        | 5           | 200         | 50                   | 3                 | 2                                 | 0.55x, 0.2x                                         | 348                               |
| <i>Stegostoma tigrinum</i> | P377_02_1**** | 500.00                                   | E220                   | 140        | 10          | 200         | 180                  | 2                 | 6                                 | 1.0x, 0.5x                                          | 496                               |
| <i>Stegostoma tigrinum</i> | P489_01_1     | 50.00                                    | E220                   | 175        | 5           | 200         | 55                   | 2                 | 5                                 | 1.0x, 0.5x                                          | 510                               |

\*S220: S220 Focused-ultrasonicator, Covaris; E220: E220 Focused-ultrasonicator, Covaris.

\*\*This library was prepared using Chromium Gnome Reagent Kits and the preparation procedure followed the official manual provided by the manufacturer.

\*\*\*This library was prepared using QIAseq FX DNA Library Kits (QIAGEN, 180473).

\*\*\*\*This library was prepared with heating 500 ng of DNA for five minutes at 90°C followed by size fractionation with 0.5 - 1.0 concentration of AMPure XP beads.

**Supplementary Table 6B.** Mate-pair libraries prepared for zebra shark genome sequencing.

| Species                    | Library ID | Targeted mate distance range (Kbp) | Starting total DNA amount ( $\mu\text{g}$ ) | DNA shearing condition |            |             |             |                   |                | # of PCR cycles (cycles) | Peak insert length (bp) |
|----------------------------|------------|------------------------------------|---------------------------------------------|------------------------|------------|-------------|-------------|-------------------|----------------|--------------------------|-------------------------|
|                            |            |                                    |                                             | machine*               | Peak power | Duty factor | Cycle/Burst | Duration (second) | Times repeated |                          |                         |
| <i>Stegostoma tigrinum</i> | P380_01_1  | 7-10                               | 4                                           | S220                   | 240        | 20          | 200         | 40                | 1              | 8                        | 536                     |
| <i>Stegostoma tigrinum</i> | P380_01_2  | 12-18                              | 4                                           | S220                   | 240        | 20          | 200         | 40                | 1              | 13                       | 681                     |

**Supplementary Table 6C.** RNA-seq libraries prepared for transcriptome data acquisition.

| Species                    | Library ID | Sex     | Stage    | Tissue               | Starting total RNA amount (ng) | Peak insert length (bp) | RNA fragment condition | # of PCR cycles | AMPure XP concentration for size selection |           |
|----------------------------|------------|---------|----------|----------------------|--------------------------------|-------------------------|------------------------|-----------------|--------------------------------------------|-----------|
|                            |            |         |          |                      |                                |                         |                        |                 | After end repair                           | After PCR |
| <i>Rhincodon typus</i>     | P381_01_1  | female  | juvenile | Gill                 | 1000                           | 323                     | 94°C, 4 min            | 9               | 1.8x                                       | 1.0x      |
| <i>Rhincodon typus</i>     | P381_02_1  | female  | juvenile | Eye                  | 1000                           | 312                     | 94°C, 4 min            | 9               | 1.8x                                       | 1.0x      |
| <i>Rhincodon typus</i>     | P381_03_1  | female  | juvenile | Stomach              | 1000                           | 325                     | 94°C, 4 min            | 9               | 1.8x                                       | 1.0x      |
| <i>Rhincodon typus</i>     | P381_04_1  | female  | juvenile | Intestine            | 1000                           | 306                     | 94°C, 4 min            | 10              | 1.8x                                       | 1.0x      |
| <i>Rhincodon typus</i>     | P381_05_1  | female  | juvenile | Pituitary            | 1000                           | 271                     | 94°C, 4 min            | 10              | 1.8x                                       | 1.0x      |
| <i>Rhincodon typus</i>     | P381_06_1  | female  | juvenile | Liver                | 1000                           | 351                     | 94°C, 4 min            | 10              | 1.8x                                       | 1.0x      |
| <i>Rhincodon typus</i>     | P381_07_1  | female  | juvenile | Kidney               | 1000                           | 278                     | 94°C, 4 min            | 10              | 1.8x                                       | 1.0x      |
| <i>Rhincodon typus</i>     | P381_09_1  | female  | juvenile | Spleen               | 1000                           | 248                     | 94°C, 4 min            | 13              | 1.8x                                       | 1.0x      |
| <i>Rhincodon typus</i>     | P381_10_1  | female  | juvenile | Intestine_upper      | 1000                           | 284                     | 94°C, 4 min            | 10              | 1.8x                                       | 1.0x      |
| <i>Rhincodon typus</i>     | P381_11_1  | female  | juvenile | Pancreas             | 1000                           | 256                     | 94°C, 4 min            | 13              | 1.8x                                       | 1.0x      |
| <i>Rhincodon typus</i>     | P433_01_1  | female  | juvenile | Follicle             | 1000                           | 256                     | 94°C, 4 min            | 4               | 1.8x                                       | 1.0x      |
| <i>Rhincodon typus</i>     | P433_02_1  | female  | juvenile | Follicle-large       | 1000                           | 272                     | 94°C, 4 min            | 6               | 1.8x                                       | 1.0x      |
| <i>Rhincodon typus</i>     | P433_03_1  | female  | juvenile | Uterus_anterior      | 1000                           | 256                     | 94°C, 4 min            | 7               | 1.8x                                       | 1.0x      |
| <i>Rhincodon typus</i>     | P433_04_1  | female  | juvenile | Uterus_middle        | 1000                           | 236                     | 94°C, 4 min            | 9               | 1.8x                                       | 1.0x      |
| <i>Rhincodon typus</i>     | P433_05_1  | female  | juvenile | Uterus_posterior     | 1000                           | 238                     | 94°C, 4 min            | 9               | 1.8x                                       | 1.0x      |
| <i>Stegostoma tigrinum</i> | P430_01_1  | female  | juvenile | Blood                | 1000                           | 256                     | 94°C, 4 min            | 8               | 1.8x                                       | 1.0x      |
| <i>Stegostoma tigrinum</i> | P430_02_1  | female  | juvenile | Eye                  | 1000                           | 279                     | 94°C, 4 min            | 6               | 1.8x                                       | 1.0x      |
| <i>Stegostoma tigrinum</i> | P430_03_1  | female  | juvenile | Olfactory bulb       | 1000                           | 277                     | 94°C, 4 min            | 6               | 1.8x                                       | 1.0x      |
| <i>Stegostoma tigrinum</i> | P430_04_1  | female  | juvenile | Muscle               | 1000                           | 253                     | 94°C, 4 min            | 8               | 1.8x                                       | 1.0x      |
| <i>Stegostoma tigrinum</i> | P430_05_1  | female  | juvenile | Cerebrum             | 1000                           | 271                     | 94°C, 4 min            | 7               | 1.8x                                       | 1.0x      |
| <i>Stegostoma tigrinum</i> | P430_06_1  | female  | juvenile | Cerebellum           | 1000                           | 238                     | 94°C, 4 min            | 9               | 1.8x                                       | 1.0x      |
| <i>Stegostoma tigrinum</i> | P430_07_1  | female  | juvenile | Diencephalon         | 1000                           | 260                     | 94°C, 4 min            | 7               | 1.8x                                       | 1.0x      |
| <i>Stegostoma tigrinum</i> | P430_08_1  | female  | juvenile | Mesencephalon        | 1000                           | 267                     | 94°C, 4 min            | 9               | 1.8x                                       | 1.0x      |
| <i>Stegostoma tigrinum</i> | P430_09_1  | female  | juvenile | Medulla oblong       | 1000                           | 281                     | 94°C, 4 min            | 7               | 1.8x                                       | 1.0x      |
| <i>Stegostoma tigrinum</i> | P430_10_1  | female  | juvenile | Gill                 | 1000                           | 244                     | 94°C, 4 min            | 9               | 1.8x                                       | 1.0x      |
| <i>Stegostoma tigrinum</i> | P430_11_1  | female  | juvenile | Heart                | 1000                           | 246                     | 94°C, 4 min            | 8               | 1.8x                                       | 1.0x      |
| <i>Stegostoma tigrinum</i> | P430_12_1  | female  | juvenile | Spleen               | 1000                           | 233                     | 94°C, 4 min            | 11              | 1.8x                                       | 1.0x      |
| <i>Stegostoma tigrinum</i> | P430_13_1  | female  | juvenile | Liver                | 1000                           | 249                     | 94°C, 4 min            | 8               | 1.8x                                       | 1.0x      |
| <i>Stegostoma tigrinum</i> | P430_14_1  | female  | juvenile | Gallbladder          | 1000                           | 251                     | 94°C, 4 min            | 8               | 1.8x                                       | 1.0x      |
| <i>Stegostoma tigrinum</i> | P430_15_1  | female  | juvenile | Stomach              | 1000                           | 242                     | 94°C, 4 min            | 8               | 1.8x                                       | 1.0x      |
| <i>Stegostoma tigrinum</i> | P430_16_1  | female  | juvenile | Intestine            | 1000                           | 248                     | 94°C, 4 min            | 8               | 1.8x                                       | 1.0x      |
| <i>Stegostoma tigrinum</i> | P430_17_1  | female  | juvenile | Colon                | 1000                           | 267                     | 94°C, 4 min            | 8               | 1.8x                                       | 1.0x      |
| <i>Stegostoma tigrinum</i> | P430_18_1  | female  | juvenile | Kidney               | 1000                           | 285                     | 94°C, 4 min            | 6               | 1.8x                                       | 1.0x      |
| <i>Stegostoma tigrinum</i> | P430_19_1  | female  | juvenile | Rectal gland         | 1000                           | 260                     | 94°C, 4 min            | 7               | 1.8x                                       | 1.0x      |
| <i>Stegostoma tigrinum</i> | P430_20_1  | female  | juvenile | Ovary                | 1000                           | 245                     | 94°C, 4 min            | 7               | 1.8x                                       | 1.0x      |
| <i>Stegostoma tigrinum</i> | P430_21_1  | female  | juvenile | Fallopian tube       | 1000                           | 272                     | 94°C, 4 min            | 6               | 1.8x                                       | 1.0x      |
| <i>Stegostoma tigrinum</i> | P430_22_1  | female  | juvenile | Olfactory epithelium | 1000                           | 259                     | 94°C, 4 min            | 7               | 1.8x                                       | 1.0x      |
| <i>Stegostoma tigrinum</i> | P183_06_1  | Unknown | Embryo   | Embryo               | 500                            | 195                     | 94°C, 8 min            | 8               | 1.8x                                       | 1.0x      |
| <i>Stegostoma tigrinum</i> | P183_07_1  | Unknown | Embryo   | Embryo               | 500                            | 174                     | 94°C, 8 min            | 9               | 1.8x                                       | 1.0x      |



**Supplementary Table 7.** Primer sequences used in genomic qPCR.

| Gene          | Chromosomal location  | Oligonucleotide primer sequence (5' to 3') |                       |
|---------------|-----------------------|--------------------------------------------|-----------------------|
|               |                       | Forward                                    | Reverse               |
| <i>HoxA1</i>  | Autosome (Scaffold 2) | TTTGCAGAAAGCAGAGCTGA                       | GCCCAGTGCAATGGTAATTT  |
| <i>FoxG1</i>  | Autosome (Scaffold 9) | GCTTTGCAACGGGATATGTT                       | CGAGGCAACTGGATATGGAT  |
| <i>Gdf11</i>  | X (Scaffold 41)       | GCCAAACAAAAGGCTTTCAG                       | CGGCTAAAGGACGAATGGTA  |
| <i>Gli1</i>   | X (Scaffold 41)       | GACTGGAATGCCCAAACAGT                       | AATCTCAGGGGATCTCAGCA  |
| <i>Stat3</i>  | X (Scaffold 41)       | TCGGAAATCCTTCGCTTCTA                       | TTCCAAATGCCTCATCCTTC  |
| <i>Dip2c</i>  | PAR (Scaffold 41)     | GCTTAGGACGTGCTGTCTCC                       | AAGGTGTTGACAGGGTGGAC  |
| <i>Aladin</i> | PAR (Scaffold 41)     | CTCACATCCCCTTCTGCTTC                       | TCAGAGTTCGGAGAAGAGGTC |
| <i>Creb1</i>  | PAR (Scaffold 41)     | CAGTGCCGGAAGAAGAAGAA                       | CTCCTCGATCAGGGTCTTGT  |
